# Supplementary material
Source: ML conference proceedings conference paper supplement (https://openreview.net/forum?id=-z7O7fk_Cs)
Supplement: supplementary_material [file attachment]

# ReadMe (JKO-Flow)

Thank you for reviewing our work titled “Invertible normalizing flow neural networks by JKO scheme”.

- `ICLR_real_data_test.ipynb` contains code and results for several tabular datasets. Due to file size limitation, we could only share data for `miniboone` and the node feature generative task
- `ICLR_simulation_test.ipynb` contains code and results for 2D simulated datasets
